1  
2  
3  
4  
5  
6  
7  
8  
9  
10  
11  
12  
13  
14  
15  
16  
17  
18  
19  
20  
21  
22  
23  
24  
25

## The Evolution of Chunks in Sequence Learning

Laure Tosatto<sup>1,2</sup>, Joël Fagot<sup>1,2</sup>, Dezso Nemeth<sup>3,4,5</sup> and Arnaud Rey<sup>1,2</sup>

<sup>1</sup>Aix Marseille Univ, CNRS, LPC, Marseille, France

<sup>2</sup>Aix Marseille Univ, ILCB, Aix-en-Provence, France

<sup>3</sup>Université Claude Bernard Lyon 1, Lyon Neuroscience Research Center, Lyon, France

<sup>4</sup>Institute of Psychology, Eotvos Lorand University, Budapest, Hungary

<sup>5</sup>Institute of Cognitive Neuroscience and Psychology, Hungarian Academy of Sciences,  
Budapest, Hungary

Correspondence concerning this article should be addressed to Laure Tosatto,  
Laboratoire de Psychologie Cognitive, CNRS, Aix-Marseille Université, 3, place Victor Hugo,  
Case D, 13331 Marseille Cedex 03, France. Email: [laure.tosatto@univ-amu.fr](mailto:laure.tosatto@univ-amu.fr)

26 **Abstract**

27 Chunking mechanisms are central to several cognitive processes and notably to the acquisition  
28 of visuo-motor sequences. Individuals segment sequences into chunks of items to perform  
29 visuo-motor tasks more fluidly, rapidly, and accurately. However, the exact dynamics of  
30 chunking processes in the case of extended practice remain unclear. Using an operant  
31 conditioning device, eighteen Guinea baboons (*Papio papio*) produced a fixed sequence of nine  
32 movements during 1,000 trials by pointing to a moving target on a touch screen. Response times  
33 analyses revealed a specific chunking pattern of the sequence for each baboon. More  
34 importantly, we found that these patterns evolved during the course of the experiment, with  
35 chunks becoming progressively fewer and longer. We identified two chunk reorganization  
36 mechanisms: the *recombination* of preexisting chunks and the *concatenation* of two distinct  
37 chunks into a single one. These results provide new evidence on chunking mechanisms in  
38 sequence learning and challenge current models of associative and statistical learning.

39 *Keywords:* chunking, sequence learning, statistical learning, associative learning, non-  
40 human primate

## 41 **The Evolution of Chunks in Sequence Learning**

42 A key mechanism allowing our cognitive system to compress information and increase  
43 short term memory capacity is the formation of chunks (Mathy & Feldman, 2012; Miller, 1956).  
44 Chunking is defined as the process of associating and grouping several items together into a  
45 single processing unit (Gobet & al, 2001; Gobet, Lloyd-Kelly and Lane, 2016). In coherence  
46 with the limits encountered by our cognitive system (Cowan, 1988, 2017), the storage capacity  
47 of the chunks themselves seems limited (3 or 4 items per chunk, Allen & Coyne, 1988; Chase  
48 & Simon, 1973; Johnson, 1970). In the field of perceptual-motor learning, chunking has been  
49 considered as the main motor sequence integration mechanism (Diedrichsen & Kornysheva,  
50 2015; Wymbs et al. 2012).

51 Perceptual-motor sequence learning is commonly described as the process by which a  
52 sequence of movements is acquired and executed with increased speed and accuracy  
53 (Willingham, 1998). Current sequence learning paradigms use a sequential button-press task:  
54 subjects are presented with a series of visual stimuli organized in a sequence and are asked to  
55 press a corresponding response button (e.g., Cohen, Ivry, & Keele, 1990; Nemeth et al., 2010;  
56 Verwey, 2001). A faster and more accurate performance over time reflects learning of the  
57 sequence. Typically, researchers have reported robust effects of sequence's length on subjects'  
58 response times (RTs): for short sequences (<4 keypresses), a decrease in the successive RTs  
59 can be observed when the sequence is learned; for longer sequences though, an initial decrease  
60 in RTs for the first 3 to 4 keypresses is followed by a longer RT on the next position. Then,  
61 RTs start decreasing again for the next 3 to 4 keypresses (e.g., Bo & Seidler, 2009; Verwey &  
62 Eikelboom, 2003). Similar results have been observed in non-human subjects (Terrace, 2002;  
63 Scarf et al., 2018). This phenomenon has been interpreted as the long sequence being  
64 spontaneously segmented into shorter motor chunks reflecting the sequence organization in  
65 memory (Sakai et al., 2003). Long temporal gaps between responses are assumed to mark chunk

66 boundaries (Abrahamse et al., 2013; Bottary et al., 2016). Yet, few studies have been interested  
67 in the evolution of chunks in the case of extended practice (e.g., Ramkumar et al., 2016; Song  
68 & Cohen, 2014; Wymbs et al., 2012). The present study aims at collecting new evidence on the  
69 evolution of chunking mechanisms in a perceptual-motor sequence learning task.

70 One of the main issues in most sequence learning studies is the inconsistent transition  
71 probabilities (TPs) between items of the sequence. Indeed, in an experimental set up where only  
72 a few response buttons are available to the subject (e.g., Grafton, Hazeltine and Ivry, 2002;  
73 Verwey, 2001; Willingham, 1999), some stimuli are necessarily presented multiple times  
74 within the same sequence. For instance, in a sequence such as A-B-A-C-D-B-C, A is either  
75 followed by B or C, therefore the probability of B given A is 0.5, whereas D is always followed  
76 by B thus the probability of B given D is 1. This heterogeneity of TPs may constrain the strength  
77 of the connections formed between the successive elements of the sequence and affect the  
78 resulting chunking pattern.

79 Another characteristic of previous studies is, apart from a few exceptions (e.g., Conway  
80 & Christiansen, 2001), that most sequence learning studies have been conducted with human  
81 participants. However, even if implicit instructions are provided, humans almost systematically  
82 use their inner language and develop strategies to perform the task (Rey et al., 2019). This may  
83 affect both their performance and their chunking processes, and it is hard to tease apart these  
84 verbal and explicit influences from associative and chunking mechanisms.

85 To avoid these difficulties, we first chose to test non-human primates for neutralizing  
86 the possible effect of language-based strategies. Second, we used sequences composed of items  
87 only occurring once per sequence, i.e., with a transitional probability between elements equal  
88 to 1, using the serial pointing task proposed by Minier et al. (2016). In this task, participating  
89 monkeys had to track and touch target locations in a 3 x 3 matrix of crosses displayed on the  
90 screen. They were exposed to the same sequence of 9 locations that always appeared in the

91 same order upon a thousand trials. RTs for each location were recorded, providing us with  
92 detailed information on the temporal dynamics of sequence processing. This extended practice  
93 on a long single repeated sequence allowed us to collect new evidence on the formation and the  
94 evolution of chunks over time.

## 95 **Method**

### 96 **Participants**

97 Thirteen female and five male Guinea baboons (*Papio papio*, age range 2.8—23.7 years)  
98 from the CNRS primate facility in Rousset (France), living in a social group of 25 individuals,  
99 were tested in this study. Water was provided *ad libitum* during the test, and the monkeys  
100 received their normal food ration of fruits every day at 5 PM. For practical reasons, we stopped  
101 the experiment after 18 monkeys completed all scheduled trials.

### 102 **Materials**

#### 103 *Apparatus*

104 This experiment was conducted with a computer-learning device based on the voluntary  
105 participation of baboons (for details, see Fagot & Bonté, 2010). Baboons implanted with a RFID  
106 microchip had free access to 10 automatic operant conditioning learning devices equipped with  
107 touch screens. Each time a monkey entered a test chamber, it was identified by its microchip,  
108 and the system resumed the trial list where the subject left it at its previous visit. The experiment  
109 was controlled by E-prime (Version 2.0, Psychology Software Tools, Pittsburgh, PA, USA).

#### 110 *Task and stimuli*

111 The screen was divided into nine equidistant predetermined locations represented by  
112 white crosses on a black background, virtually labeled as position 1 to 9 (see Figure 1). A trial  
113 began with the presentation of a yellow fixation cross at the bottom of the screen. Once pressed,  
114 the fixation cross disappeared and the nine white crosses were displayed, one of them being  
115 replaced by the target, a red circle. When the target was touched, it was immediately replaced

116 by the cross. The red circle then replaced the next position in the sequence until it was touched,  
117 and a new position was displayed. Reward was provided at the end of a sequence of nine  
118 touches.

119

## 120 **Figure 1**

### 121 *Experimental display and stimuli presentation*

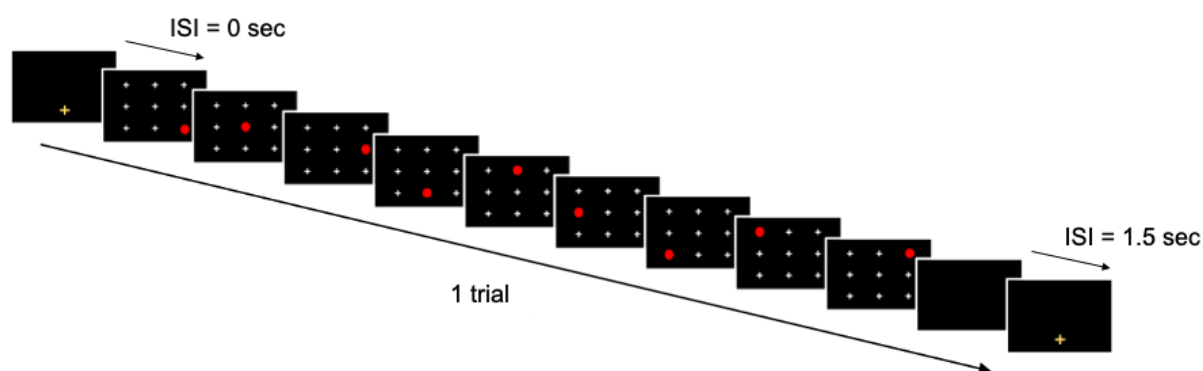

122

123

124

125 To learn the task, baboons initially received random trials that were rewarded after three  
126 touches. Then, the number of touches in a trial was progressively increased up to nine. If  
127 baboons touched an inappropriate location (incorrect trial) or failed to touch the screen within  
128 5,000ms after the red circle's appearance (aborted trial), a green screen was displayed for  
129 3,000ms as a marker of failure. Aborted trials were not retained and therefore presented again,  
130 while incorrect trials were not. The time elapsed between the appearance of the red circle and  
131 the baboon's touch on this circle was recorded as the RT.

### 132 *Design of the sequences*

133 To control the motor difficulty of the transitions to be produced in the sequence, a  
134 random phase of sequence production was first conducted, where thirteen baboons performed  
135 random sequences of six positions for 1,000 trials. Based on these random trials, a baseline  
136 measure for all possible transitions from one location to another was computed by calculating

137 mean RTs for each transition (e.g., from position 1 to 9), leading to a 9x9 matrix of mean RTs  
138 calculated over the entire group of baboons (see Appendix A).

139 Based on these baseline measures, we designed two sequences of nine serial positions  
140 for which each transition T was faster (or equally fast) to produce than the next one (i.e.,  
141  $T_1 \leq T_2 \leq \dots \leq T_8$ ; see Appendix B). This way, a decrease in RT for a given transition can be  
142 interpreted as the anticipation (or learning) of that position from the previous one.

### 143 **Procedure**

144 Baboons were either presented with Sequence 1 (N=8) or Sequence 2 (N=10) and had  
145 to produce it for 1000 successive trials. RTs for each position of the sequence were recorded  
146 for all the trials.

### 147 **Results**

148 On average, baboons required 2.9 days to complete the 1,000 trials, with a mean of  
149 339.7 trials per day and a mean accuracy level of 92.5% ( $SD=6.2\%$ ). Incorrect trials were  
150 removed from the dataset (7.8%). A recursive trimming procedure excluded RTs greater or  
151 smaller than 2.5 standard deviations from the subject's mean for each of the nine possible  
152 positions (24.4%)<sup>1</sup>. RTs for each of the nine positions and for the 1,000 trials were divided into  
153 10 Blocks of 100 trials.

### 154 **General sequence learning**

155 Learning of the sequence was estimated on mean RTs by a repeated measures one-way  
156 ANOVA with Block (1-10) as the within factor. The effect of Block was highly significant  
157 (Block 1,  $M=452.8$ ,  $SD=45.3$ ; Block 10,  $M=400.1$ ,  $SD=56.3$ ),  $F(1,9)=30.43$ ,  $p<.001$ ,  $\eta^2=0.642$ ,

---

<sup>1</sup> Inspection of the response times distribution revealed that a majority of responses were produced around 500ms. A smaller group of RTs appeared around 1,000 ms and was likely due to situations in which baboon's response was not recorded by the computer, because their hands were dirty. In this situation, they had to touch the screen again, and longer RTs were recorded (that are on average twice longer compared to the first responses). This is why we have adopted this recursive trimming procedure. After applying this procedure, there was still a mean number of 77.9 remaining RTs for each position per participant and per block of 100 trials (the minimum number of remaining RTs for one position being 32).

158 indicating that mean RTs decreased throughout the blocks of trials and that monkeys learned  
159 the sequence.

### 160 **Chunking of the sequence**

161 To study the chunking pattern of the sequence by monkeys, we adopted the following  
162 reasoning. We considered successive positions  $A$  and  $B$  to be part of the same chunk as long as  
163 the transition time from one position to the next did not correspond to a significant increase in  
164 RT. Therefore, if  $RT_A < RT_B$  then  $A$  and  $B$  do not belong to the same chunk, and the  $AB$  transition  
165 marks a chunk boundary (Kennerly et al., 2004). This reasoning was applied on each Block and  
166 for each monkey. Statistical significance was assessed through paired-sample t-tests for each  
167 pair of successive positions. Each time the RT of a pair's second position was significantly  
168 higher than the first position, it marked a chunk boundary. Figure 2 illustrates this method on  
169 the performances of one monkey.

170



171 **Figure 2**

172 *Evolution of the chunking pattern for one individual (Atmosphere) throughout the task*

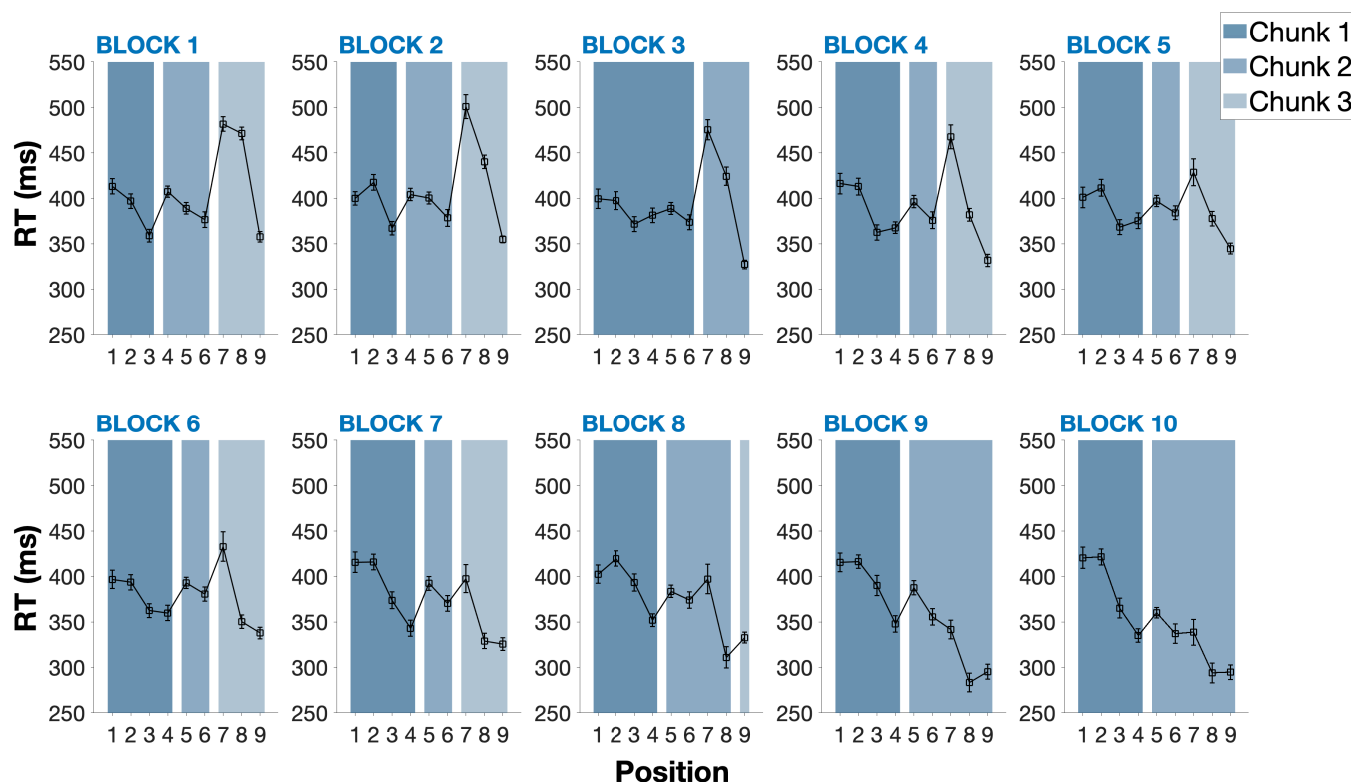

173

174 *Note.* Mean RT per position across the 10 blocks of trials for one baboon (Atmosphere) showing the evolution of  
175 the chunking pattern. This individual initially parses the sequence into three chunks of three positions in the first  
176 three blocks of trials. A reorganization starts in Block 4, as Position 4 is integrated into the first chunk. Another  
177 reorganization occurs in Block 8, where the 2<sup>nd</sup> and 3<sup>rd</sup> chunks are progressively concatenated (error bars represent  
178 95% confidence intervals).

179

180 **Evolution of chunks**

181 With this method, we were able to quantify the number of chunks and their average size  
182 produced on each block by each monkey. For example, the monkey from Figure 2 produced 3  
183 chunks and an average chunk size of 3 in Block 1. In Block 10, the number of chunks was 2  
184 and the average chunk size was 4.5. Figure 3 reports the average number of chunks and chunk  
185 size for all monkeys across the 10 blocks of the experiment. For example, we found that the

186 mean chunk size was 2.2 positions ( $CI=0.31$ ;  $Min=1$ ;  $Max=5$ ) in the first block and 3.375  
187 ( $CI=0.53$ ;  $Min=1$ ;  $Max=8$ ) in the last block. Two repeated measures one-way ANOVA were  
188 conducted to test the effect of Block on the mean number of chunks and the average chunk size.  
189 This analysis revealed that the number of chunks significantly decreased across blocks,  
190  $F(1,9)=9.421$ ,  $p<.001$ ,  $\eta^2=.357$ , and that the average chunk size significantly increased across  
191 blocks,  $F(1,9)=4.794$ ,  $p<.01$ ,  $\eta^2=.22$ .

192

### 193 **Figure 3**

194 *Evolution of chunks across blocks*

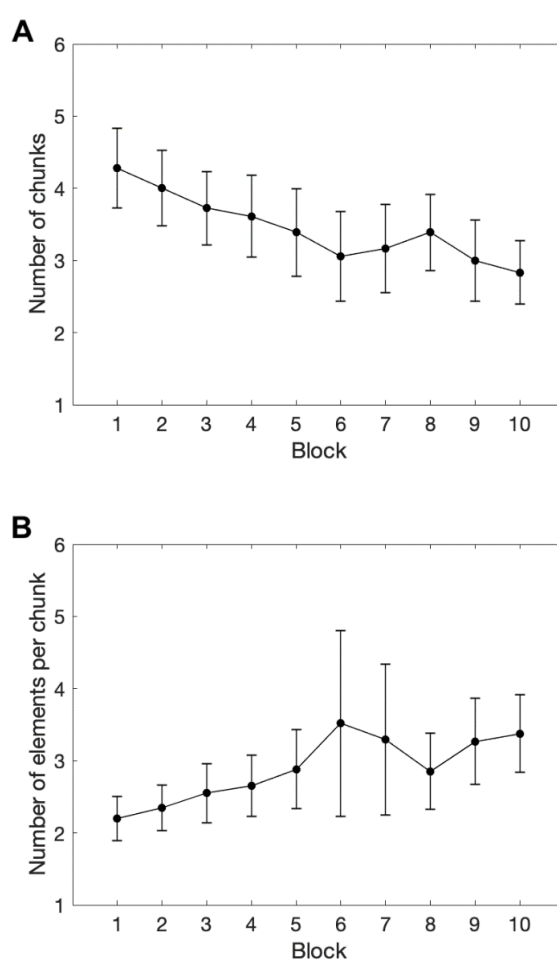

195

196 *Note.* A. Mean number of chunks per block. B. Mean chunk size (i.e. number of elements per chunk) per block  
197 (error bars represent 95%confidence intervals).

198           The evolution of these two indicators can be accounted for by two reorganization  
199 mechanisms: the *recombination* of pre-existing chunks (50.4% of the reorganizations, observed  
200 for 15 monkeys) and the *concatenation* of two chunks into a single one (49.6% of the  
201 reorganizations, observed for 17 monkeys). An illustration of these reorganizations is provided  
202 in Figure 2: from Block 1 to Block 3, the first six positions of the sequence were parsed into  
203 two equivalent chunks of three positions, indicated by the significant increase in RTs between  
204 Position 3 and 4. Starting Block 4, the chunks are recombined with Position 4 being slowly  
205 integrated to the first chunk as its difference with Position 3 disappears and a significant  
206 increase in RTs is now appearing between Position 4 and 5. The concatenation of two chunks  
207 into a single one is also illustrated in Figure 2: while Chunks 2 and 3 were separated by a  
208 significant increase in RT between Position 6 and Position 7 until Block 8, this difference  
209 disappeared in Block 9, and the two chunks were then grouped into one. Table 1 provides a  
210 detailed description of the chunks appearing in Figure 2. For each block of trials, it counts the  
211 number of chunks, their respective size, and each occurrence of a concatenation or a  
212 recombination. At the group level, Table 2 provides the total number of concatenations and  
213 recombinations obtained for each block and for all monkeys<sup>2</sup>. A repeated measure ANOVA  
214 with Block and Mechanisms (concatenation vs. recombination) did not reveal any significant  
215 effect (all  $p$ s > .05).  
216

---

<sup>2</sup> See Supplementary material for a description of the patterns of responses for each monkey over blocks. The same information as the one displayed in Figure 2 and Table 1 for the monkey “Atmosphere” is provided for all monkeys from the present experiment (see Figures and Tables S1 to S17). These data clearly show that each monkey displays a specific chunking pattern that follows a specific evolution over blocks of trials.

217 **Table 1**

218 *Summary table of the reorganizations observed throughout the task for one baboon*  
 219 *(Atmophere).*

|              | Chunk size |    |    | Nb of chunks | Concatenation | Recombinaison |
|--------------|------------|----|----|--------------|---------------|---------------|
|              | C1         | C2 | C3 |              |               |               |
| Block 1      | 3          | 3  | 3  | 3            | -             | -             |
| 2            | 3          | 3  | 3  | 3            | -             | -             |
| 3            | 3          | 3  | 3  | 3            | -             | -             |
| 4            | 4          | 2  | 3  | 3            | -             | 1             |
| 5            | 4          | 2  | 3  | 3            | -             | 1             |
| 6            | 4          | 2  | 3  | 3            | -             | -             |
| 7            | 4          | 2  | 3  | 3            | -             | -             |
| 8            | 4          | 4  | 1  | 3            | -             | 1             |
| 9            | 4          | 5  | -  | 2            | 1             | -             |
| 10           | 4          | 5  | -  | 2            | -             | -             |
| <b>Total</b> |            |    |    |              | 1             | 3             |

220 *Note.* Numbers in columns 2-4 refer respectively to the size of the first (C1), second (C2) and third (C3) chunk (if  
 221 any) in the sequence.

222  
 223 **Table 2**

224 *Total number of concatenations and recombinations per block.*

| Block        | Concatenations | Recombinations |
|--------------|----------------|----------------|
| 2            | 11             | 9              |
| 3            | 8              | 7              |
| 4            | 6              | 7              |
| 5            | 6              | 4              |
| 6            | 8              | 5              |
| 7            | 3              | 6              |
| 8            | 1              | 10             |
| 9            | 8              | 3              |
| 10           | 5              | 6              |
| <b>Total</b> | 56             | 57             |

225  
 226 **Additional analyses**  
 227 Our data show that a chunking pattern emerges and evolves over time for each monkey  
 228 (i.e., Figures S1 to S17). The averaged data on Block 1 indicates that a first chunking pattern

229 rapidly emerges after a few dozen of trials. However, we checked that monkeys produced the  
230 same ascending pattern of RTs during their first 10 trials on the repeated sequence than the one  
231 we computed from the random baseline trials (see Figure S18). This ensures that our sequences  
232 were correctly designed and that chunking mechanisms are rapidly efficient.

233 We also compared the mean response times computed on every trial and averaged over  
234 blocks in the random and repeated sequence conditions. The result indicates that chunking  
235 mechanisms qualitatively and quantitatively influenced the monkey's behavior by significantly  
236 increasing their global efficacy in this visuo-motor task (see Figure S19).

### 237 **Discussion**

238 Three main findings were obtained in the present study. First, we found that non-human  
239 primates spontaneously segmented long sequences into short chunks. Second, with extended  
240 practice, chunks became longer and fewer. Third, based on these observations, we assumed this  
241 decrease in the number of chunks and this increase in chunks' size was due to two types of  
242 reorganizations: the recombination of several preexisting chunks and the concatenation of two  
243 distinct chunks into a single one.

244 Our first finding is consistent with previous studies on sequence learning in humans as  
245 participants were found to initially segment the sequence into small chunks (e.g., Nissen &  
246 Bullemer, 1987; Verwey, 1996; 2001; 2003, Verwey et al., 2002). Chunks typically contained  
247 2 to 4 items, sometimes 5 (Sakai et al., 2003), which is similar to what we observed in the first  
248 block of the experiment. With extended practice, the mean chunk size could reach up to 8  
249 successive positions. However, these large chunks are very rare in our data and in the literature,  
250 although Kennerly, Sakai and Rushworth (2004) found in humans a mean chunk size of 7.83  
251 items for sequences of 12 items. This difference is likely due to motor constraints that vary  
252 across experimental paradigms and may facilitate the development of longer chunks. This first  
253 result indicates that chunking is a fundamental mechanism of sequence learning in both human

254 and non-human primates, and that the cognitive system spontaneously forms strong  
255 associations between repeated co-occurring events (e.g., Perruchet & Vinter, 1998; 2002; Rey  
256 et al., 2019). However, the results also show that there is an initial limit to the number of  
257 associations that can be formed successively.

258 Our second finding indicates that extended practice allows the baboons to exceed these  
259 limits, as we found that chunks can be reorganized into longer segments. This feature is not  
260 systematic as we observed reorganizations in 17 monkeys out of 18. Ramkumar et al. (2016)  
261 suggested that to limit the cost of computation, learning new sequences of movements starts  
262 with many short chunks. With practice, the execution of short chunks becomes more efficient,  
263 which reduces the computation's complexity. This increase in efficiency for short chunks would  
264 promote more complex computations leading to the development of longer chunks. However,  
265 the precise neural mechanisms supporting these changes over time are still unclear, as are the  
266 conditions that promote switching from one pattern to another.

267 Our third main finding is related to the evolution of chunks and the two reorganization  
268 mechanisms that allow chunks to become longer: the concatenation and recombination of  
269 chunks. Abrahamse et al. (2013) define the concatenation mechanism as the process by which  
270 two successive chunks are performed more fluidly and the temporal gap between them  
271 decreases. This description is consistent with our findings but, to our knowledge, there is no  
272 other report of two successive chunks becoming one and the temporal gap between them  
273 disappearing. As for recombinations, they correspond to the emergence of a new segmentation  
274 pattern across chunks. As shown in Table 2, the occurrence of concatenation or recombination  
275 does not seem related to a specific stage of learning. In both cases, one can assume that these  
276 modifications in the chunking pattern is certainly related to the increase in efficiency in the  
277 realization of some chunks (Ramkumar et al., 2026). This would then modify the stability of  
278 the preexisting chunking pattern and favor either the concatenation of two chunks into a longer



304 that the long sequence was initially parsed into small chunks. After extensive training, some of  
305 these small chunks were concatenated leading to longer chunks and to a more efficient  
306 processing of the sequence. However, we also found other types of chunk reorganizations, that  
307 we called “recombinations”, that are not predicted by current models of statistical and  
308 associative learning. These results will certainly provide new constraints for elaborating the  
309 next generations of computational models accounting for chunking mechanisms.

### 310 **Acknowledgements**

311 This work was supported by the BLRI Labex (ANR-11-LABX-0036), Institut Convergence  
312 ILCB (ANR-16-CONV-0002), the CHUNKED ANR project (#ANR-17-CE28-0013-02) and  
313 IDEXLYON Fellowship of the University of Lyon as part of the Programme Investissements  
314 d’Avenir (ANR-16-IDEX-0005). The funders had no role in study design, data collection and  
315 analysis, decision to publish, or preparation of the manuscript. We are grateful to Laura  
316 Ordonnez-Magro for her helpful comments on a previous version of the manuscript.

### 317 **Open Practices Statements**

318 Data from the experiment are available on Open Science Framework at  
319 <https://osf.io/xcw95/>.

### 320 **Conflict of Interest**

321 LT, JF, DN and AR declare that they have no conflict of interest.

### 322 **Animal rights**

323 This research adhered to the applicable French rules for ethical treatment of research  
324 animals and received ethical approval from the French Ministry of Education (approval  
325 APAFIS#2717-2015111708173794 10 v3).

326



327  
328  
329  
330  
331  
332  
333  
334  
335  
336  
337  
338  
339  
340  
341  
342  
343  
344  
345  
346  
347  
348  
349  
350  
351

## References

- Abrahamse, E., Ruitenberg, M., De Kleine, E., & Verwey, W. B. (2013). Control of automated behavior: insights from the discrete sequence production task. *Frontiers in Human Neuroscience*, 7, 82.
- Allen, P. A., & Coyne, A. C. (1988). Age differences in primary organization or processing variability? Part I: An examination of age and primary organization. *Experimental Aging Research*, 14(3), 143-149.
- Bo, J., Borza, V., & Seidler, R. D. (2009). Age-related declines in visuospatial working memory correlate with deficits in explicit motor sequence learning. *Journal of Neurophysiology*, 102(5), 2744-2754.
- Bottary, R., Sonni, A., Wright, D., & Spencer, R. M. (2016). Insufficient chunk concatenation may underlie changes in sleep-dependent consolidation of motor sequence learning in older adults. *Learning & Memory*, 23(9), 455-459.
- Chase, W. G., & Simon, H. A. (1973). Perception in chess. *Cognitive Psychology*, 4(1), 55-81.
- Cohen, A., Ivry, R. I., & Keele, S. W. (1990). Attention and structure in sequence learning. *Journal of Experimental Psychology: Learning, Memory, and Cognition*, 16(1), 17.
- Conway, C. M., & Christiansen, M. H. (2001). Sequential learning in non-human primates. *Trends in Cognitive Sciences*, 5(12), 539-546.
- Cowan, N. (1988). Evolving conceptions of memory storage, selective attention, and their mutual constraints within the human information-processing system. *Psychological Bulletin*, 104(2), 163.
- Cowan, N. (2017). The many faces of working memory and short-term storage. *Psychonomic Bulletin & Review*, 24(4), 1158-1170.

- 352 Diedrichsen, J., & Kornysheva, K. (2015). Motor skill learning between selection and  
353 execution. *Trends in Cognitive Sciences*, 19(4), 227-233.
- 354 Fagot, J., & Bonté, E. (2010). Automated testing of cognitive performance in monkeys: Use of  
355 a battery of computerized test systems by a troop of semi-free-ranging baboons (*Papio*  
356 *papio*). *Behavior Research Methods*, 42(2), 507-516.
- 357 Gobet, F., Lane, P. C., Croker, S., Cheng, P. C., Jones, G., Oliver, I., & Pine, J. M. (2001).  
358 Chunking mechanisms in human learning. *Trends in Cognitive Sciences*, 5(6), 236-243.
- 359 Gobet, F., Lloyd-Kelly, M., & Lane, P. C. (2016). What's in a name? The multiple meanings of  
360 “Chunk” and “Chunking”. *Frontiers in Psychology*, 7, 102.
- 361 Grafton, S. T., Hazeltine, E., & Ivry, R. B. (2002). Motor sequence learning with the  
362 nondominant left hand. *Experimental Brain Research*, 146(3), 369-378.
- 363 Johnson, N. F. (1970). The role of chunking and organization in the process of recall.  
364 In *Psychology of Learning and Motivation* (Vol. 4, pp. 171-247). Academic Press.
- 365 Kennerley, S. W., Sakai, K., & Rushworth, M. F. S. (2004). Organization of action sequences  
366 and the role of the pre-SMA. *Journal of Neurophysiology*, 91(2), 978-993.
- 367 Mathy, F., & Feldman, J. (2012). What's magic about magic numbers? Chunking and data  
368 compression in short-term memory. *Cognition*, 122(3), 346-362.
- 369 Miller, G. A. (1956). The magical number seven, plus or minus two: Some limits on our  
370 capacity for processing information. *Psychological Review*, 63(2), 81.
- 371 Minier, L., Fagot, J., & Rey, A. (2016). The temporal dynamics of regularity extraction in non-  
372 human primates. *Cognitive Science*, 40(4), 1019-1030.
- 373 Nemeth, D., Janacsek, K., Londe, Z., Ullman, M. T., Howard, D. V., & Howard, J. H. (2010).  
374 Sleep has no critical role in implicit motor sequence learning in young and old  
375 adults. *Experimental Brain Research*, 201(2), 351-358.

- 376 Nissen, M. J., & Bullemer, P. (1987). Attentional requirements of learning: Evidence from  
377 performance measures. *Cognitive Psychology*, *19*(1), 1-32.
- 378 Perruchet, P., & Vinter, A. (1998). PARSER: A model for word segmentation. *Journal of*  
379 *Memory and Language*, *39*(2), 246-263.
- 380 Perruchet, P., & Vinter, A. (2002). The self-organizing consciousness. *Behavioral and Brain*  
381 *Sciences*, *25*(3), 297-330.
- 382 Rey, A., Minier, L., Malassis, R., Bogaerts, L., & Fagot, J. (2019). Regularity extraction across  
383 species: Associative learning mechanisms shared by human and non-human  
384 primates. *Topics in Cognitive Science*, *11*(3), 573-586.
- 385 Ramkumar, P., Acuna, D. E., Berniker, M., Grafton, S. T., Turner, R. S., & Kording, K. P.  
386 (2016). Chunking as the result of an efficiency computation trade-off. *Nature*  
387 *Communications*, *7*(1), 1-11.
- 388 Sakai, K., Kitaguchi, K., & Hikosaka, O. (2003). Chunking during human visuomotor sequence  
389 learning. *Experimental Brain Research*, *152*(2), 229-242.
- 390 Scarf, D., Smith, C. D., Jaswal, V. K., Magnuson, J. S., & Terrace, H. (2018). Chunky Monkey?  
391 The spontaneous temporal chunking of simultaneous chains by Humans (Homo  
392 Sapiens) and rhesus monkeys (Macaca mulatta). In A. Ibáñez-Contreras & B.  
393 Hernandez-Godinez (Eds), *Studies of Rhesus Monkeys and their Behaviors* (p. 39-58).  
394 Nova Science Publishers.
- 395 Servan-Schreiber, E., & Anderson, J. R. (1990). Learning artificial grammars with competitive  
396 chunking. *Journal of Experimental Psychology: Learning, Memory, and*  
397 *Cognition*, *16*(4), 592.
- 398 Song, S., & Cohen, L. (2014). Impact of conscious intent on chunking during motor  
399 learning. *Learning & Memory*, *21*(9), 449-451.

- 400 Terrace H.S. (2002) The Comparative Psychology of Chunking. In S.B. Fountain, M.D.  
401 Bunsey, J.H. Danks, & M.K. McBeath (eds), *Animal Cognition and Sequential Behavior*  
402 (p. 23-55). Springer, Boston, MA.
- 403 Verwey, W. B. (1996). Buffer loading and chunking in sequential keypressing. *Journal of*  
404 *Experimental Psychology: Human Perception and Performance*, 22(3), 544.
- 405 Verwey, W. B. (2001). Concatenating familiar movement sequences: The versatile cognitive  
406 processor. *Acta Psychologica*, 106(1-2), 69-95.
- 407 Verwey, W. B., & Eikelboom, T. (2003). Evidence for lasting sequence segmentation in the  
408 discrete sequence-production task. *Journal of Motor Behavior*, 35(2), 171-181.
- 409 Verwey, W. B., Lammens, R., & van Honk, J. (2002). On the role of the SMA in the discrete  
410 sequence production task: a TMS study. *Neuropsychologia*, 40(8), 1268-1276.
- 411 Willingham, D. B. (1998). A neuropsychological theory of motor skill learning. *Psychological*  
412 *Review*, 105(3), 558.
- 413 Willingham, D. B. (1999). Implicit motor sequence learning is not purely perceptual. *Memory*  
414 *& Cognition*, 27(3), 561-572.
- 415 Wymbs, N. F., Bassett, D. S., Mucha, P. J., Porter, M. A., & Grafton, S. T. (2012). Differential  
416 recruitment of the sensorimotor putamen and frontoparietal cortex during motor  
417 chunking in humans. *Neuron*, 74(5), 936-946.
- 418

419

## Appendix A

420 *Mean response times over the entire group of baboons for each of the 72 possible transitions*

421 *calculated from the 1000 random trials.*

| 1 <sup>st</sup> position in Transition | 2 <sup>nd</sup> position in Transition |     |     |     |     |     |     |     |     |
|----------------------------------------|----------------------------------------|-----|-----|-----|-----|-----|-----|-----|-----|
|                                        | 1                                      | 2   | 3   | 4   | 5   | 6   | 7   | 8   | 9   |
| 1                                      | -                                      | 519 | 573 | 495 | 482 | 509 | 521 | 497 | 543 |
| 2                                      | 569                                    | -   | 553 | 513 | 474 | 511 | 523 | 491 | 509 |
| 3                                      | 558                                    | 519 | -   | 513 | 472 | 488 | 544 | 493 | 512 |
| 4                                      | 551                                    | 517 | 560 | -   | 464 | 509 | 522 | 482 | 546 |
| 5                                      | 549                                    | 504 | 552 | 501 | -   | 483 | 535 | 479 | 527 |
| 6                                      | 567                                    | 515 | 546 | 507 | 484 | -   | 533 | 483 | 511 |
| 7                                      | 555                                    | 504 | 558 | 475 | 463 | 516 | -   | 484 | 541 |
| 8                                      | 554                                    | 512 | 540 | 485 | 448 | 472 | 512 | -   | 507 |
| 9                                      | 546                                    | 512 | 540 | 514 | 460 | 464 | 550 | 485 | -   |

422 *Note.* All transitions are in milliseconds (ms) and correspond to the time elapsed between the  
423 disappearance of the red circle from the 1<sup>st</sup> position of the Transition and the monkey's touch on the 2<sup>nd</sup> position  
424 of the Transition.

425

426

## Appendix B

427 *Selected sequences and corresponding mean transition times (based on the baseline*

428 *acquisition, see Appendix A)*

| Sequence         | Position |   |   |   |   |   |   |   |   | Mean transition time (ms) |     |     |     |     |     |     |     |
|------------------|----------|---|---|---|---|---|---|---|---|---------------------------|-----|-----|-----|-----|-----|-----|-----|
|                  | 1        | 2 | 3 | 4 | 5 | 6 | 7 | 8 | 9 | T1                        | T2  | T3  | T4  | T5  | T6  | T7  | T8  |
| Seq. 1<br>(N=8)  | 9        | 5 | 6 | 8 | 2 | 4 | 7 | 1 | 3 | 460                       | 483 | 483 | 512 | 513 | 522 | 555 | 573 |
| Seq. 2<br>(N=10) | 7        | 5 | 6 | 8 | 2 | 4 | 9 | 1 | 3 | 463                       | 483 | 483 | 512 | 513 | 522 | 555 | 573 |

429
